# Supplementary material for: GOx/Hb Cascade Oxidized Crosslinking of Silk Fibroin for Tissue-Responsive Wound Repair
Source: MDPI journal article supplement (doi:10.3390/gels8010056), 2022-01-12
Supplement: s1 [file gels-1526282-supplementary.pdf › gels-1526282-supplementary.pdf]

## Supplementary Materials

# GOx/Hb Cascade Oxidized Crosslinking of Silk Fibroin for Tissue-Responsive Wound Repair

Hongdou Shen <sup>1,2,†</sup>, Pei Wang <sup>1,†</sup>, Xiaoke Han <sup>2</sup>, Mengli Ma <sup>2</sup>, Yinghui Shang <sup>2</sup>, Ye Ju <sup>2</sup>, Saiji Shen <sup>2</sup>, Feng Yin <sup>1,\*</sup> and Qigang Wang <sup>2,\*</sup>

<sup>1</sup> Department of Joint Surgery, Shanghai East Hospital, School of Medicine, Tongji University, Shanghai 200120, P.R. China; shenhongdou2018@163.com (H.S.); drwp007@163.com (P.W.)

<sup>2</sup> School of Chemical Science and Engineering, Tongji University, Shanghai 200092, P.R. China; 1931002@tongji.edu.cn (X.H.); 17334567254@163.com (M.M.); shangdiyinghui@163.com (Y.S.); juye1997@hotmail.com (Y.J.); shensaiji@tongji.edu.cn (S.S.)

\* Correspondence: 1300229@tongji.edu.cn (F.Y.); wangqg66@tongji.edu.cn (Q.W.)

† These authors contributed equally to this work.

## Results and Discussion

**Table S1.** Concentrations of each ingredient in SF hydrogels.

| Sample  | SF                     | Glucose                 | GOx                    | Hb                    |
|---------|------------------------|-------------------------|------------------------|-----------------------|
| 1SF-10G | 1.0% w/v               | 4.5 mg mL <sup>-1</sup> | 10 mu mL <sup>-1</sup> | 3 mg mL <sup>-1</sup> |
| 1SF-15G |                        |                         | 15 mu mL <sup>-1</sup> |                       |
| 1SF-20G |                        |                         | 20 mu mL <sup>-1</sup> |                       |
| 3SF-10G | 10 mu mL <sup>-1</sup> |                         |                        |                       |
| 3SF-15G | 15 mu mL <sup>-1</sup> |                         |                        |                       |
| 3SF-20G | 20 mu mL <sup>-1</sup> |                         |                        |                       |
| 5SF-10G | 10 mu mL <sup>-1</sup> |                         |                        |                       |
| 5SF-15G | 15 mu mL <sup>-1</sup> |                         |                        |                       |
| 5SF-20G | 20 mu mL <sup>-1</sup> |                         |                        |                       |

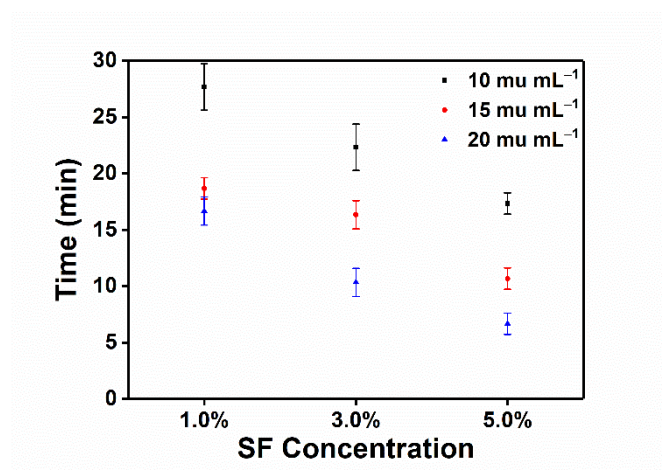

**Figure S1.** Gelation times of varying SF and GOx concentration at 37 °C. Error bars represent the mean  $\pm$  standard deviation (s.d.); n = 3.

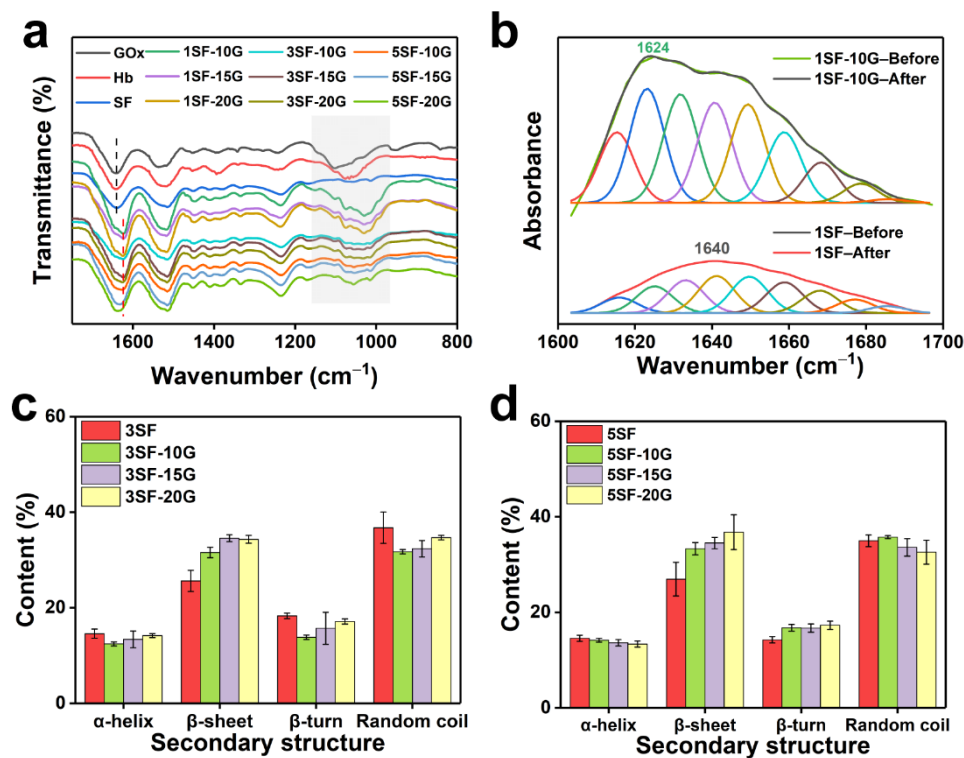

**Figure S2.** Mechanism of SF hydrogel formation. (a) FTIR spectra of GOx, Hb, SF hydrogels. (b) Peak fitting diagram of 1SF, 1SF-10G were performed using a PeakFit v4.12. (c, d) The results of second structure of SF hydrogels by peak fitting, Error bar represent mean  $\pm$  s.d.;  $n \geq 3$ .

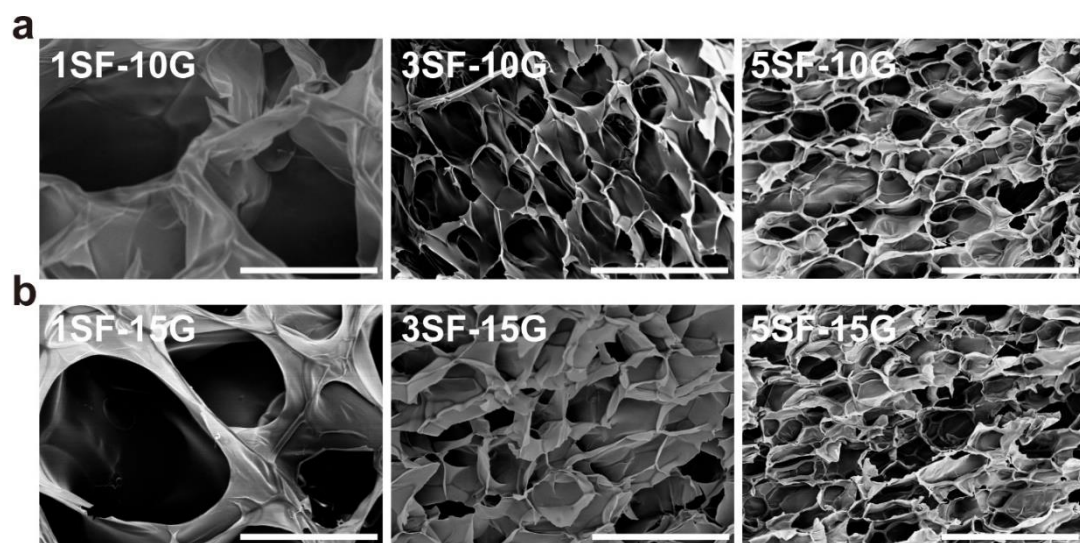

**Figure S3.** Characterization of hydrogel morphology. The 3D porous structure of SF hydrogel (a) SF/glucose/GOx (10  $\mu\text{M}$  mL $^{-1}$ )/Hb, (b) SF/glucose/GOx (15  $\mu\text{M}$  mL $^{-1}$ )/Hb with different SF concentration. Scale bars are 50  $\mu\text{m}$ .

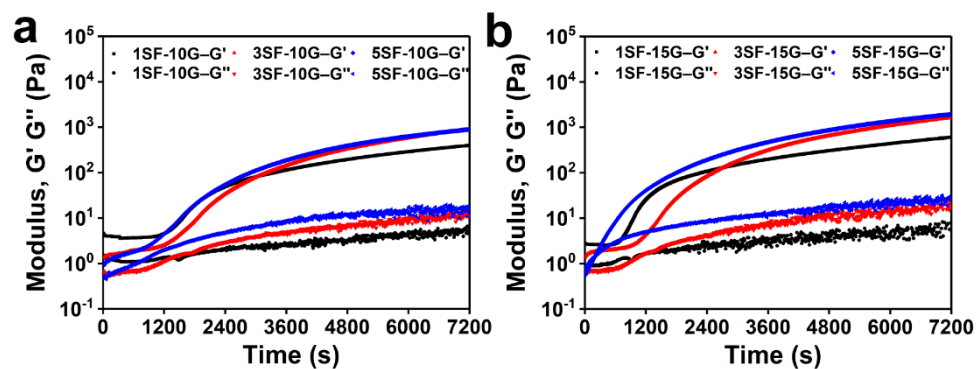

**Figure S4.** Rheological properties of SF hydrogels under different enzymatic systems. The storage modulus ( $G'$ ) and loss modulus ( $G''$ ) of (a) SF/glucose/GOx ( $10\mu\text{mL}^{-1}$ )/Hb and (b) SF/glucose/GOx ( $15\mu\text{mL}^{-1}$ )/Hb hydrogels.

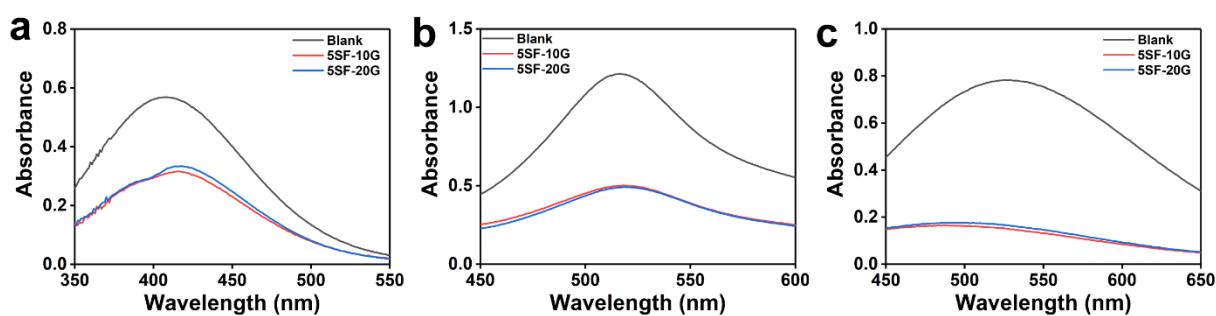

**Figure S5.** UV-vis spectra of (a)  $\text{H}_2\text{O}_2$ , (b) DPPH and (c)  $\cdot\text{OH}$  after being scavenged by the SF hydrogels for one hour.

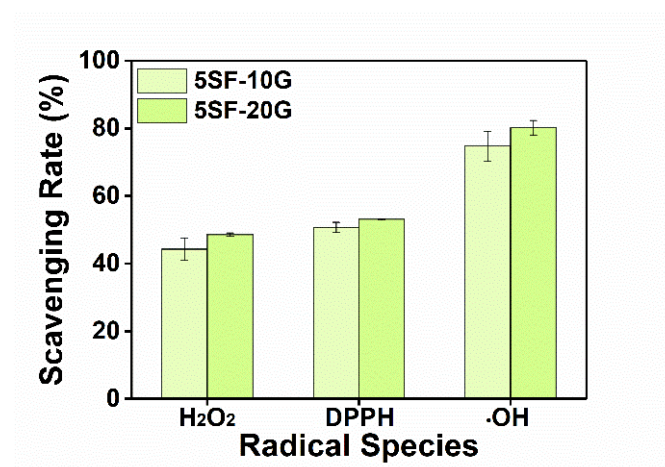

**Figure S6.**  $\text{H}_2\text{O}_2$ , DPPH and  $\cdot\text{OH}$  scavenging rate of the SF hydrogels (5SF-10G, 5SF-20G). Error bar represent mean  $\pm$  s.d.;  $n \geq 3$ .

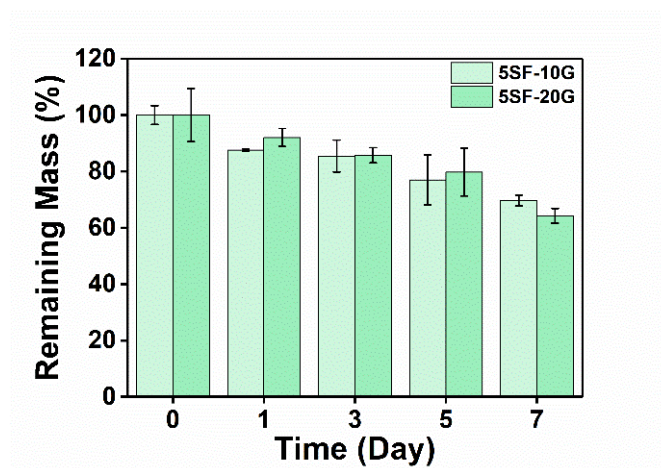

**Figure S7.** Mass Remaining of silk hydrogels after enzymatic degradation. Error bar represent mean  $\pm$  s.d.;  $n \geq 3$ .

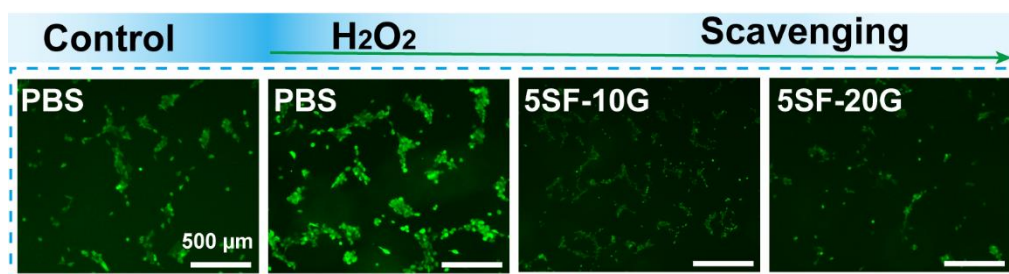

**Figure S8.** The oxidative stress in cells incubated with SF hydrogels (5SF-10G and 5SF-20G) was monitored via a ROS probe (DCFH-DA). Scale bar are 500  $\mu$ m.

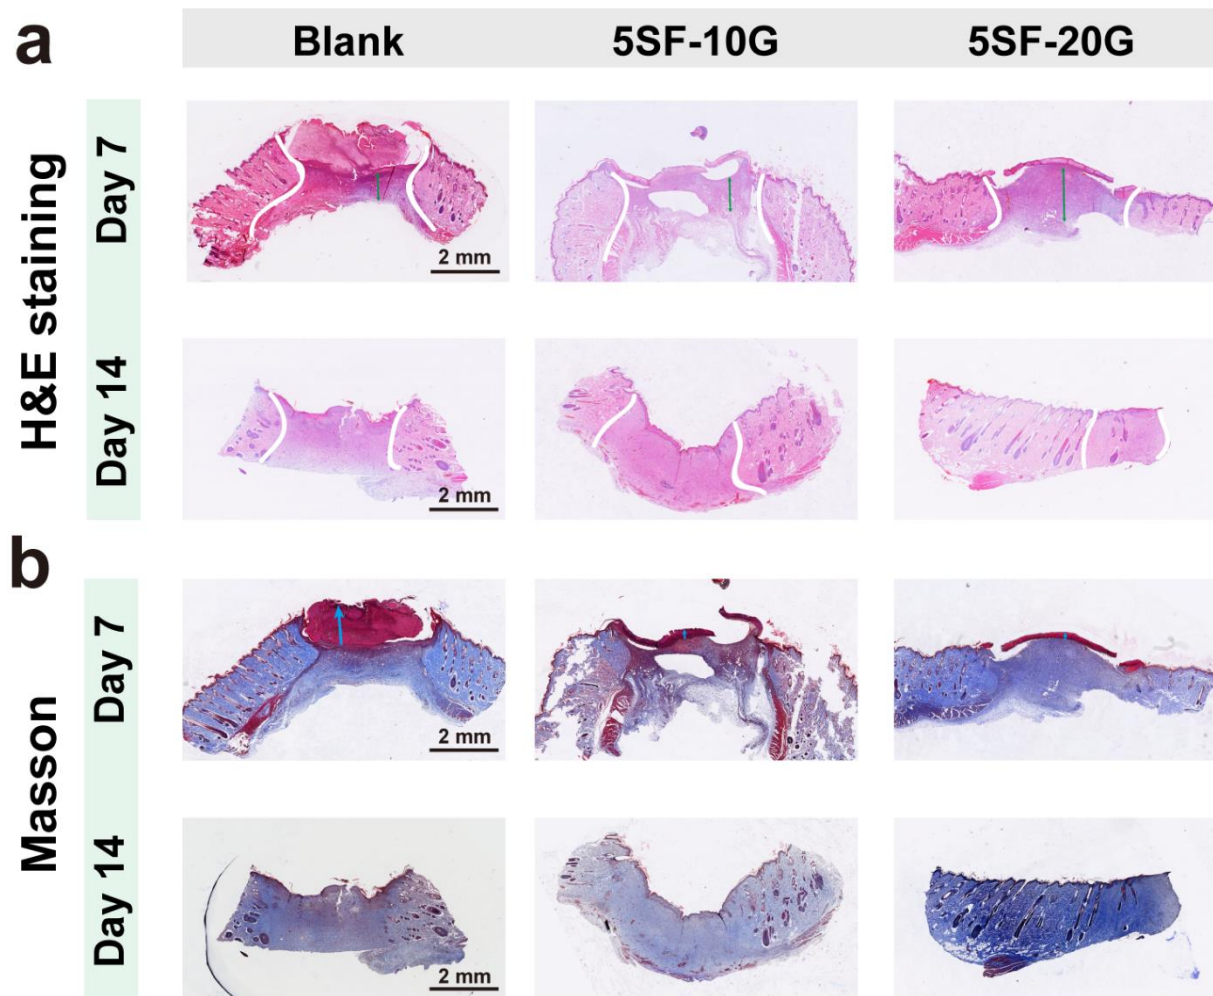

**Figure S9.** Wound healing abilities of SF hydrogels. (a) H&E staining of the wound tissues on Days 7 and 14. White solid lines and green double-headed arrows represent the range and thickness of granulation tissue (b) Masson's trichrome staining of the wound tissues on Days 7 and 14. Blue arrows represent the residual scab, Scale bar are 2 mm.



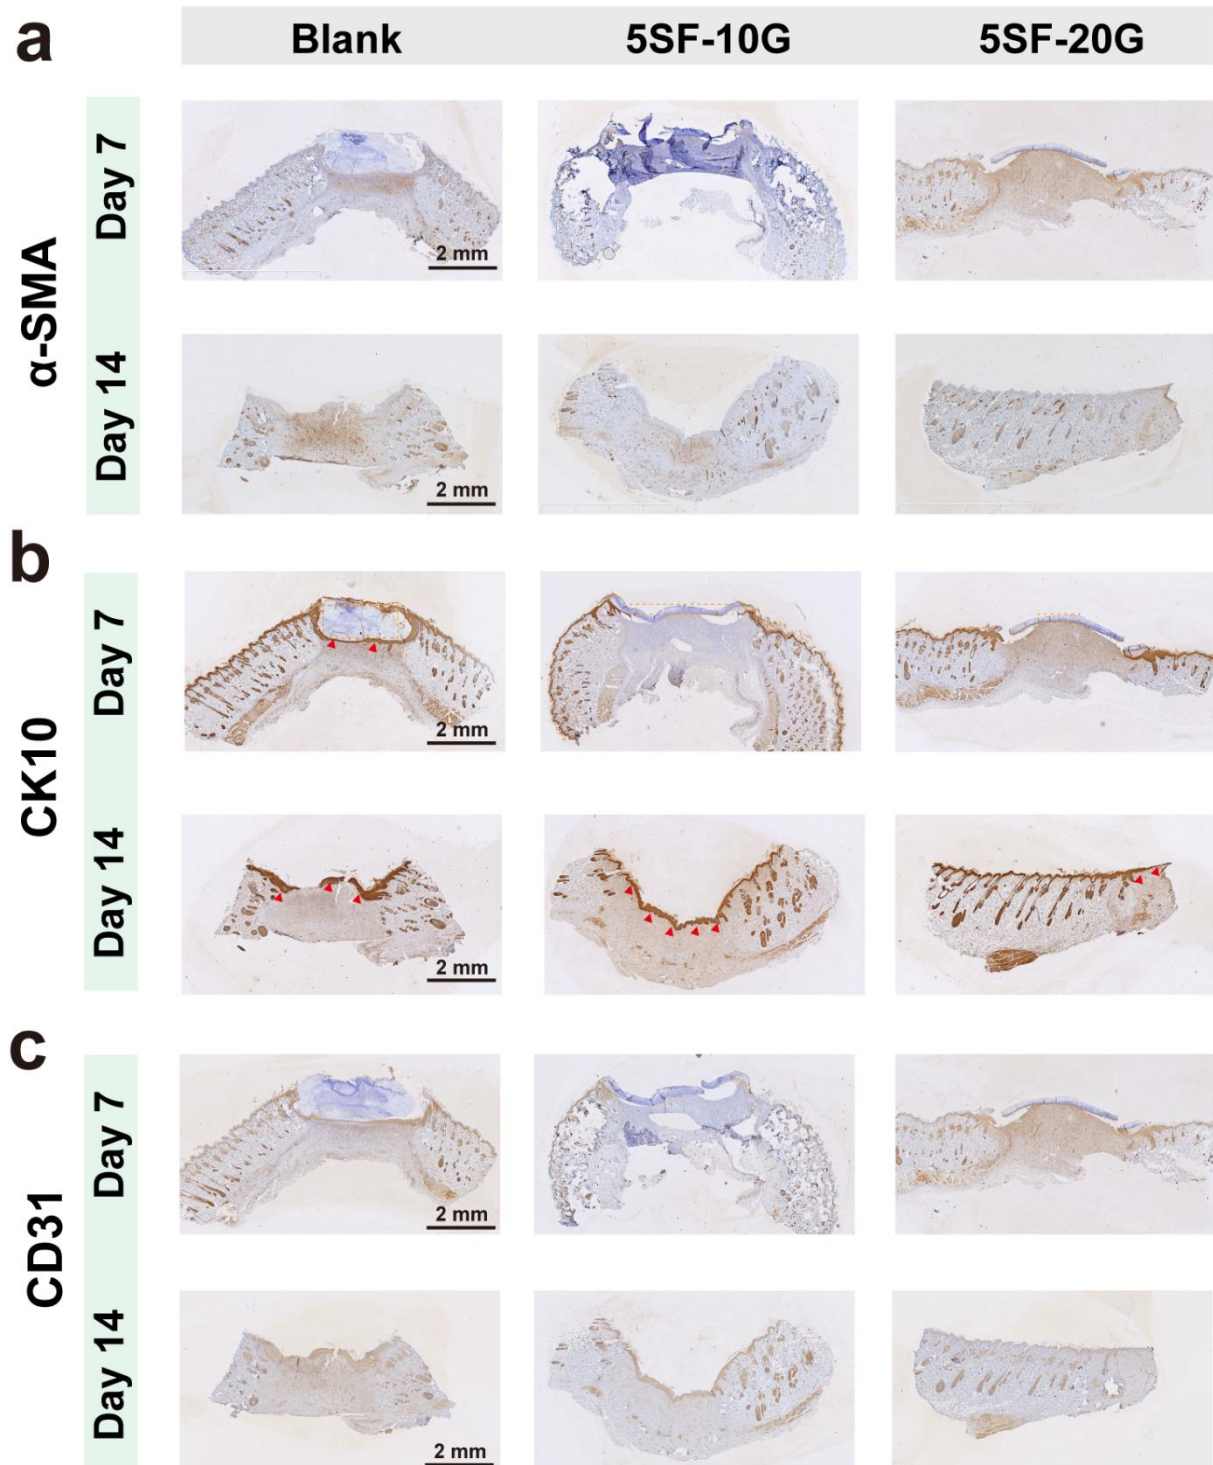

**Figure S10.** Wound healing abilities of SF hydrogels. (a)  $\alpha$ -SMA staining, showing myofibroblasts on days 7 and 14. (b) CK10 staining, showing keratin in skin on days 7 and 14, orange dotted frames and red triangles indicated the negative and positive expression of keratin, respectively. (c) CD31 staining images, representing the extent of vascularization on days 7 and 14. Scale bars are 2 mm.
